# Supplementary material
Source: PubMed Central journal article supplement (PMC10834355)
Supplement: NIHMS1946739-supplement-Table_S1.pdf [file NIHMS1946739-supplement-Table_S1.pdf]

**Table S1. Characteristics of donors of human pancreas, islet and acinar cell samples, Related to Figure 1-6.** ND: non-diabetic; T2D: type 2 diabetes; nPOD: network for Pancreatic Organ Donors with Diabetes; BMI: body mass index. HbA1c: glycated hemoglobin.

| <b>Human pancreas</b> |         |         |        |                  |                          |                    |                     |
|-----------------------|---------|---------|--------|------------------|--------------------------|--------------------|---------------------|
| Disease state         | nPOD ID | Age (y) | Gender | Ethnicity        | BMI (kg/m <sup>2</sup> ) | C-Peptide (pmol/L) | Duration of T2D (y) |
| Non-diabetic (ND)     | 6009    | 45      | M      | Caucasian        | 30.6                     | 11.32              | N/A                 |
|                       | 6034    | 32      | F      | Caucasian        | 25.2                     | 3.15               | N/A                 |
|                       | 6168    | 51      | M      | Hispanic         | 25.2                     | N/A                | N/A                 |
|                       | 6331    | 27      | F      | African American | 24.0                     | 3.01               | N/A                 |
|                       | 6487    | 27      | M      | African American | 27.8                     | 5.52               | N/A                 |
|                       | 6535    | 31      | F      | Caucasian        | 29.6                     | 6.59               | N/A                 |
| Type 2 diabetic (T2D) | 6110    | 20.7    | F      | African American | 40                       | 0.58               | N/D                 |
|                       | 6133    | 46      | F      | Caucasian        | 40.2                     | 0.84               | 20                  |
|                       | 6194    | 47      | M      | Caucasian        | 23.7                     | 0.16               | 13                  |
|                       | 6221    | 61      | F      | Caucasian        | 33.7                     | 3.05               | 4                   |
|                       | 6277    | 48      | M      | African American | 29.5                     | 0.47               | 10                  |
|                       | 6329    | 49      | F      | Hispanic         | 36.4                     | 7.46               | 25                  |
|                       | 6541    | 57      | M      | Hispanic         | 26.9                     | 3.41               | 1                   |

| <b>Human islets</b> |               |                  |           |        |                  |                          |           |            |               |
|---------------------|---------------|------------------|-----------|--------|------------------|--------------------------|-----------|------------|---------------|
| Application         | Disease state | RIID or Prodo ID | Age (y)   | Gender | Ethnicity        | BMI (kg/m <sup>2</sup> ) | HbA1c (%) | Purity (%) | Viability (%) |
| RT-PCR              | ND            | SAMN08612554     | 51        | F      | Hispanic         | 32                       | 5.3       | 90         | 90            |
|                     |               | SAMN08619388     | 60        | F      | African American | 18.2                     | 6.0       | 80         | 87            |
|                     |               | SAMN08930760     | 45        | M      | Caucasian        | 30.5                     | 5.0       | 90         | 96            |
|                     |               | SAMN08769124     | 15        | M      | Hispanic         | 24.6                     | 5.1       | 80         | 97            |
|                     |               | SAMN0876908      | 49        | M      | Caucasian        | 26.3                     | 5.1       | 95         | 95            |
|                     | T2D           | HP-18165-01T2D   | 63        | M      | Hispanic         | 22                       | 7.3       | 85         | 95            |
|                     |               | SAMN10832912     | 54        | M      | African American | 33.7                     | 8.0       | 90         | 94            |
|                     |               | SAMN11245238     | 66        | F      | Caucasian        | 29.8                     | 6.5       | 90         | 95            |
|                     |               | SAMN08769092     | 57        | M      | Hispanic         | 34.6                     | 10.4      | 98         | 80            |
|                     |               | SAMN08930811     | 47        | M      | Caucasian        | 32.2                     | 5.7       | 70         | 63            |
|                     |               | SAMN08933946     | 52        | M      | Caucasian        | 50.0                     | N/A       | 92         | 99            |
|                     |               | SAMN08786217     | 49        | M      | N/A              | 28.2                     | N/A       | 90         | 95            |
| WB                  | ND            | SAMN08769072     | 55        | M      | Caucasian        | 32.5                     | 14.7      | 96         | 73            |
|                     |               | SAMN08611211     | 45        | M      | Caucasian        | 29.8                     | 5.1       | 95         | 95            |
|                     |               | SAMN08619527     | 28        | M      | Caucasian        | 34.7                     | 4.2       | 95         | 95            |
|                     |               | SAMN15942269     | 63        | F      | African American | 26.9                     | 5.5       | 80         | 98            |
|                     |               | SAMN13972304     | 49        | M      | Latino           | 34.8                     | 5.5       | 90         | 96            |
|                     | T2D           | HP-17036-01      | 59        | M      | Caucasian        | 26.9                     | 5.8       | 90         | 90            |
|                     |               | HP-20199-01      | 21        | M      | Hispanic         | 27.3                     | 5.3       | 90         | 95            |
|                     |               | HP-18103-01T2D   | 35        | F      | Hispanic         | 34                       | 7.1       | 85         | 95            |
|                     |               | SAMN09498258     | 54        | M      | Hispanic         | 23.6                     | 5.8       | 83         | 96            |
|                     |               | SAMN11157311     | 34        | F      | Caucasian        | 31.7                     | 7.3       | 92         | 92            |
|                     |               | SAMN08786337     | 53        | M      | N/A              | 31                       | N/A       | 60         | 96            |
| IHC                 | ND            | SAMN08769092     | See above |        |                  |                          |           |            |               |
|                     |               | SAMN08768765     | 65        | F      | Caucasian        | 42.6                     | 5.9       | 95         | 95            |
|                     |               | SAMN08768991     | 51        | M      | Caucasian        | 29                       | 5.1       | 85         | 95            |
|                     |               | SAMN08611141     | 48        | M      | Hispanic         | 32.4                     | 5.6       | 95         | 95            |
|                     |               | SAMN08611143     | 32        | M      | Caucasian        | 26.2                     | 5.3       | 85         | 98            |
|                     |               | HP-18054-01      | 40        | M      | Hispanic         | 25                       | 5.3       | 95         | 95            |
|                     |               | HP-18304-01      | 21        | M      | Hispanic         | 27.3                     | 5.4       | 85         | 95            |
|                     |               | HP-18310-01      | 38        | M      | Hispanic         | 28                       | 5.9       | 90         | 95            |

|                                            |    |              |                  |   |                  |      |     |    |    |
|--------------------------------------------|----|--------------|------------------|---|------------------|------|-----|----|----|
| Transplantations                           | ND | SAMN12227196 | 51               | M | Caucasian        | 32.8 | 4.9 | 95 | 95 |
|                                            |    | HP-19226-01  | 51               | M | Caucasian        | 31.3 | 5.2 | 95 | 95 |
|                                            |    | HP-19073-01  | 50               | M | Caucasian        | 21.2 | 5.5 | 90 | 95 |
|                                            |    | SAMN13836615 | 58               | M | Hispanic         | 23.2 | 5.7 | 90 | 95 |
|                                            |    | HP-20030-01  | 67               | M | Hispanic         | 22.5 | 5.5 | 90 | 95 |
|                                            |    | HP-20191-01  | 39               | F | Caucasian        | 21.9 | 5.6 | 95 | 95 |
| Phospho-antibody microarrays               | ND | HP-20199-01  | 21               | M | Hispanic         | 27.3 | 5.1 | 95 | 95 |
|                                            |    | SAMN09768368 | 56               | F | Caucasian        | 26.6 | N/A | 90 | 90 |
|                                            |    | HP-18336-01  | 61               | F | Caucasian        | 24.5 | 5.1 | 90 | 95 |
| scRNA-seq                                  | ND | HP-18341-01  | 48               | M | Caucasian        | 26.3 | 5.1 | 90 | 95 |
|                                            |    | SAMN10079665 | 25               | M | Caucasian        | 31   | 5.0 | 95 | 98 |
|                                            |    | HP-19073-01  | <i>See above</i> |   |                  |      |     |    |    |
| WB (signaling pathways)                    | ND | HP-19102-01  | 40               | F | Hispanic         | 31.8 | 4.8 | 95 | 95 |
|                                            |    | HP-19283-01  | 43               | F | Caucasian        | 31.7 | 5.7 | 90 | 95 |
|                                            |    | HP-18196-01  | 49               | M | Hispanic         | 30.3 | 5.8 | 85 | 95 |
|                                            |    | SAMN13186657 | 44               | F | Hispanic         | 24.1 | 5.8 | 90 | 95 |
|                                            |    | SAMN09768368 | 56               | F | Caucasian        | 26.6 | N/A | 90 | 90 |
|                                            |    | SAMN09228907 | 62               | M | African American | 36.1 | 5.8 | 90 | 95 |
| Viability assays following PAR2 inhibition | ND | HP-21132-01  | 31               | M | Caucasian        | 26.6 | 5.2 | 90 | 95 |
|                                            |    | HP-21146-01  | 39               | M | Caucasian        | 27.6 | 5.5 | 85 | 95 |
|                                            |    | HP-21148-01  | 19               | M | N/A              | 23.1 | 5.8 | 95 | 95 |
|                                            |    | HP-21161-01  | 43               | M | Hispanic         | 25.5 | 5.4 | 90 | 95 |
|                                            |    | SAMN29794444 | 45               | M | Caucasian        | 24.8 | 5.3 | 90 | 96 |
|                                            |    | HP-22294-02  | 36               | M | Caucasian        | 24.4 | 5.7 | 90 | 95 |

### Human acinar cells

| Application | Disease state | Prodo ID       | Age (y)          | Gender | Ethnicity        | BMI (kg/m <sup>2</sup> ) | HbA1c (%) |
|-------------|---------------|----------------|------------------|--------|------------------|--------------------------|-----------|
| RT-PCR      | ND            | HP-18336-01    | <i>See above</i> |        |                  |                          |           |
|             |               | HP-18132-01    | 45               | M      | Hispanic         | 25                       | 5.1       |
|             |               | HP-18144-01    | 47               | M      | N/A              | 28.1                     | 5.8       |
|             | T2D           | HP-18165-01T2D | <i>See above</i> |        |                  |                          |           |
|             |               | HP-18179-01T2D | 59               | F      | Asian            | 34                       | 6.7       |
|             |               | HP-20259-01T2D | 59               | M      | Hispanic         | 25.1                     | 7.3       |
| WB          | ND            | HP-20268-01    | 55               | M      | Hispanic         | 23                       | 4.7       |
|             |               | HP-19030-01    | 25               | M      | Hispanic         | 27.3                     | 5.2       |
|             |               | HP-18132-01    | <i>See above</i> |        |                  |                          |           |
|             |               | HP-17346-01    | 27               | M      | Native American  | 25.8                     | 5.6       |
|             | T2D           | HP-18179-01T2D | <i>See above</i> |        |                  |                          |           |
|             |               | HP-18320-01T2D | 61               | M      | African American | 27.4                     | 7.1       |
|             |               | HP-18165-01T2D | <i>See above</i> |        |                  |                          |           |
|             |               | HP-20259-01T2D | 59               | M      | Hispanic         | 25.1                     | 7.3       |

### Human ductal cells

| Application | Disease state | Prodo ID    | Age (y) | Gender | Ethnicity        | BMI (kg/m <sup>2</sup> ) | HbA1c (%) |
|-------------|---------------|-------------|---------|--------|------------------|--------------------------|-----------|
| RT-PCR      | ND            | HP-20296-01 | 47      | M      | Caucasian        | 35.3                     | 5.5       |
|             |               | HP-21035-01 | 65      | F      | Caucasian        | 25.2                     | 5.2       |
|             |               | HP-22021-01 | 52      | F      | African American | 23.2                     | 5.5       |
