# Supplementary material
Source: PubMed Central journal article supplement (PMC10834355)
Supplement: NIHMS1946739-supplement-Table_S2.pdf [file NIHMS1946739-supplement-Table_S2.pdf]

**Table S2: List of oligonucleotides used for gene expression analysis, Related to Figure 1.**

| <b>Gene name</b> | <b>Accession number</b> | <b>Forward sequence (5'-3')</b> | <b>Reverse sequence (5'-3')</b> |
|------------------|-------------------------|---------------------------------|---------------------------------|
| <i>ELANE</i>     | NM_001972.4             | TGCGCCCAACTTCGTCATGTCTG         | CGTAGCCGTTTTCGAAGATGCG          |
| <i>CELA2A</i>    | NM_007919.2             | GCACAAGGACTGGAACCTCCAAC         | GTTGTTGGGTAGAATGGTGCCG          |
| <i>CELA2B</i>    | NM_015849.3             | GCCAGCATAACCTCTACGTTGC          | GCCAGTTTGAGCAGGGCAATGT          |
| <i>CELA3A</i>    | NM_005747.5             | GCTGGTGACATCCTTCCCAACA          | AGTTCCACCTGGAGCAGTGCTT          |
| <i>CELA3B</i>    | NM_007352.3             | CTGGTGACATCCTTCCCAACGA          | GGAGCAGTGTTTCATAGTCCACC         |
| <i>AMY2A</i>     | NM_000699.4             | GATAATGGGAGCAACCAAGTGGC         | CAGTATGTGCCAGCAGGAAGAC          |
| <i>PDX1</i>      | NM_000209.4             | GAAGTCTACCAAAGCTCACGCG          | GGAACCTCTTCTCCAGCTCTAG          |
| <i>CTSG</i>      | NM_001911.3             | ACACCCAGCAACACATCACTGC          | GGTTCACGTTTCGATTCCGTCTG         |
| <i>KRT19</i>     | NM_002276               | AGCTAGAGGTGAAGATCCGCGA          | GCAGGACAATCCTGGAGTTCTC          |
| <i>MUC1</i>      | NM_002456               | CCTACCATCCTATGAGCGAGTAC         | GCTGGGTTTGTGTAAGAGAGGC          |
| <i>ACTB</i>      | NM_001101.3             | CACCATTGGCAATGAGCGGTTC          | AGGTCTTTGCGGATGTCCACGT          |
