# Supplementary material
Source: PubMed Central journal article supplement (PMC10834355)
Supplement: NIHMS1946739-supplement-Table_S3.pdf [file NIHMS1946739-supplement-Table_S3.pdf]

**Table S3: Numbers of high-quality recovered cells from scRNA-seq experiments, Related to Figure 5.**

|                   | $\alpha$ -cells | $\beta$ -cells | PP-cells | $\delta$ -cells | $\epsilon$ -cells | acinar cells | ductal cells | endothelial cells | mesenchymal cells | Total |
|-------------------|-----------------|----------------|----------|-----------------|-------------------|--------------|--------------|-------------------|-------------------|-------|
| <b>DMSO</b>       | 214             | 157            | 8        | 17              | 2                 | 222          | 430          | 58                | 91                | 1199  |
| <b>Telaprevir</b> | 619             | 456            | 18       | 48              | 11                | 269          | 1269         | 100               | 404               | 3194  |
| <b>Sivelestat</b> | 469             | 338            | 12       | 33              | 4                 | 89           | 459          | 40                | 212               | 1656  |
