# Supplementary material
Source: PubMed Central journal article supplement (PMC10834355)
Supplement: NIHMS1946739-supplement-Table_S4.pdf [file NIHMS1946739-supplement-Table_S4.pdf]

**Table S4: Genes linked to cytoskeleton remodeling pathway regulated by the indicated transcription factors in human beta-cell treated with telaprevir, Related to Figure 5.**

| <b>Gene symbol</b> | <b>Description</b>                                      | <b>TF</b>             | <b>FC</b> | <b>FDR</b> |
|--------------------|---------------------------------------------------------|-----------------------|-----------|------------|
| <i>ANXA2</i>       | Annexin A2                                              | CTNNB1,<br>TP53       | 1.28      | 0.00973    |
| <i>DSP</i>         | Desmoplakin                                             | CTNNB1,<br>TP53       | 1.26      | 0.00841    |
| <i>BRK1</i>        | BRICK1 subunit of SCAR/WAVE<br>actin nucleating complex | MYC                   | 1.27      | 1.41E-05   |
| <i>ACTG1</i>       | Actin gamma 1                                           | MYC                   | 1.26      | 0.00532    |
| <i>ARPC1B</i>      | Actin related protein 2/3 complex<br>subunit 1B         | MYC,<br>STAT1         | 1.33      | 0.000284   |
| <i>DSTN</i>        | Destrin                                                 | MYC,<br>RELA,<br>TP53 | 1.4       | 2.77E-16   |
| <i>LGALS1</i>      | Galectin 1                                              | RELA                  | 1.45      | 1.81E-08   |
| <i>VIM</i>         | Vimentin                                                | RELA,<br>TP53         | 1.35      | 0.00697    |
